# Supplementary material for: Efficient and stable organic solar cells via a sequential process
Source: Royal Society of Chemistry journal article supplement (doi:10.1039/c6tc02338j), 2016-01-01
Supplement: c6tc02338j1.pdf [file c6tc02338j1.pdf]

Electronic Supplementary Information For:

## **Efficient and stable organic solar cells via sequential process**

Pei Cheng,<sup>ad</sup> Cenqi Yan,<sup>b</sup> Yang Wu,<sup>c</sup> Shuixing Dai,<sup>b</sup> Wei Ma<sup>\*c</sup> and Xiaowei Zhan<sup>\*b</sup>

*<sup>a</sup>Beijing National Laboratory for Molecular Sciences and CAS Key Laboratory of Organic Solids, Institute of Chemistry, Chinese Academy of Sciences, Beijing 100190, China.*

*<sup>b</sup>Department of Materials Science and Engineering, College of Engineering, Key Laboratory of Polymer Chemistry and Physics of Ministry of Education, Peking University, Beijing 100871, China. E-mail: xwzhan@pku.edu.cn*

*<sup>c</sup>State Key Laboratory for Mechanical Behavior of Materials, Xi'an Jiaotong University, Xi'an 710049, China. E-mail: msewma@mail.xjtu.edu.cn*

*<sup>d</sup>University of Chinese Academy of Sciences, Beijing 100049, China.*

**Table s1** Average and best device data based on s-BHJ films with different thicknesses and different DCB content in mixed solvent

| Donor<br>(nm) | Acceptor<br>(nm) | Active layer<br>(nm) | DCB<br>(%) | $V_{OC}$<br>(V) | $J_{SC}$<br>(mA cm <sup>-2</sup> ) | Calc $J_{SC}$<br>(mA cm <sup>-2</sup> ) | FF<br>(%) | PCE (%) |      |
|---------------|------------------|----------------------|------------|-----------------|------------------------------------|-----------------------------------------|-----------|---------|------|
|               |                  |                      |            |                 |                                    |                                         |           | ave     | best |
| 50            | 35               | 76                   | 5          | 0.81            | 14.2                               | 13.9                                    | 61.9      | 7.1     | 7.3  |
| 65            | 35               | 90                   | 5          | 0.81            | 15.3                               | 14.9                                    | 60.4      | 7.5     | 7.8  |
| 80            | 35               | 103                  | 5          | 0.80            | 15.3                               | 15.0                                    | 55.8      | 6.9     | 7.1  |
| 65            | 50               | 105                  | 5          | 0.82            | 14.9                               | 14.6                                    | 64.1      | 7.8     | 8.0  |
| 80            | / <sup>a</sup>   | / <sup>a</sup>       | 0          | 0.75            | 3.91                               | 3.75                                    | 35.6      | 1.1     | 1.1  |
| 80            | 50               | 123                  | 3          | 0.82            | 16.6                               | 16.3                                    | 61.8      | 8.4     | 8.6  |
| 80            | 50               | 120                  | 5          | 0.81            | 16.6                               | 16.4                                    | 62.7      | 8.5     | 8.6  |
| 80            | 50               | 117                  | 7          | 0.81            | 16.7                               | 16.5                                    | 62.4      | 8.4     | 8.6  |
| 95            | 50               | 134                  | 5          | 0.81            | 16.1                               | 15.4                                    | 60.5      | 7.8     | 8.1  |

<sup>a</sup> PC<sub>71</sub>BM can't form a uniform film with pure DCM.

**Table s2** Compositions of m-BHJ and s-BHJ films in different depth

| Structure | DIO (%) | Depth (nm) | Atom ratio of O/F | Polymer weight content (%) |
|-----------|---------|------------|-------------------|----------------------------|
| m-BHJ     | 0       | 0          | 3.037             | 62                         |
| m-BHJ     | 0       | 24         | 4.769             | 38                         |
| m-BHJ     | 0       | 48         | 6.022             | 30                         |
| m-BHJ     | 0       | 72         | 4.506             | 40                         |
| m-BHJ     | 0       | 96         | 3.393             | 55                         |
| m-BHJ     | 0       | 120        | 4.135             | 44                         |
| m-BHJ     | 3       | 0          | 4.001             | 46                         |
| m-BHJ     | 3       | 24         | 5.488             | 33                         |
| m-BHJ     | 3       | 48         | 4.008             | 46                         |
| m-BHJ     | 3       | 72         | 3.743             | 49                         |
| m-BHJ     | 3       | 96         | 2.907             | 65                         |
| m-BHJ     | 3       | 120        | 3.355             | 56                         |
| s-BHJ     | 0       | 0          | 20.61             | 8.4                        |
| s-BHJ     | 0       | 24         | 4.171             | 44                         |
| s-BHJ     | 0       | 48         | 3.323             | 56                         |
| s-BHJ     | 0       | 72         | 2.770             | 69                         |
| s-BHJ     | 0       | 96         | 2.513             | 74                         |
| s-BHJ     | 0       | 120        | 2.378             | 82                         |

**Table s3** Hole and electron mobilities of m-BHJ and s-BHJ films

| Device  | DIO (%) | Thickness (nm) | Pre-annealing | Stability test | $\mu_h$ (cm <sup>2</sup> V <sup>-1</sup> s <sup>-1</sup> ) | $\mu_e$ (cm <sup>2</sup> V <sup>-1</sup> s <sup>-1</sup> ) |
|---------|---------|----------------|---------------|----------------|------------------------------------------------------------|------------------------------------------------------------|
| m-BHJ-0 | 0       | 97             | No            | No             | $1.9 \times 10^{-4}$                                       | $2.6 \times 10^{-4}$                                       |
| m-BHJ-1 | 3       | 100            | No            | No             | $3.2 \times 10^{-4}$                                       | $2.8 \times 10^{-4}$                                       |
| m-BHJ-2 | 3       | 101            | No            | Yes            | $4.1 \times 10^{-5}$                                       | $3.2 \times 10^{-4}$                                       |
| m-BHJ-3 | 3       | 102            | Yes           | No             | $1.2 \times 10^{-4}$                                       | $3.0 \times 10^{-4}$                                       |
| m-BHJ-4 | 3       | 102            | Yes           | Yes            | $5.3 \times 10^{-5}$                                       | $3.2 \times 10^{-4}$                                       |
| s-BHJ-1 | 0       | 120            | No            | No             | $8.1 \times 10^{-4}$                                       | $2.8 \times 10^{-4}$                                       |
| s-BHJ-2 | 0       | 122            | No            | Yes            | $1.4 \times 10^{-4}$                                       | $2.9 \times 10^{-4}$                                       |
| s-BHJ-3 | 0       | 118            | Yes           | No             | $7.9 \times 10^{-4}$                                       | $2.7 \times 10^{-4}$                                       |
| s-BHJ-4 | 0       | 121            | Yes           | Yes            | $8.1 \times 10^{-4}$                                       | $2.9 \times 10^{-4}$                                       |

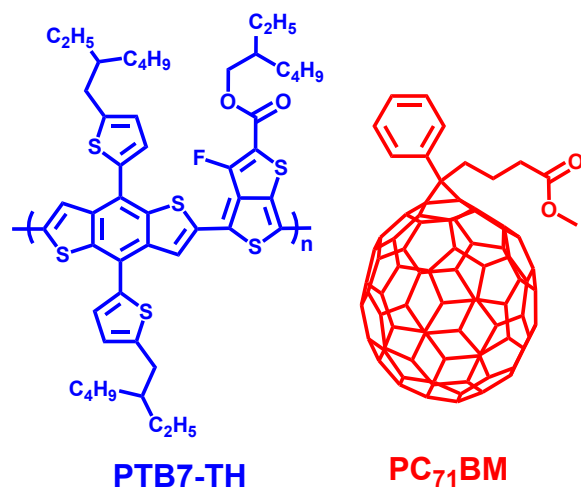

**Fig. s1** Chemical structures of PTB7-TH and PC<sub>71</sub>BM.

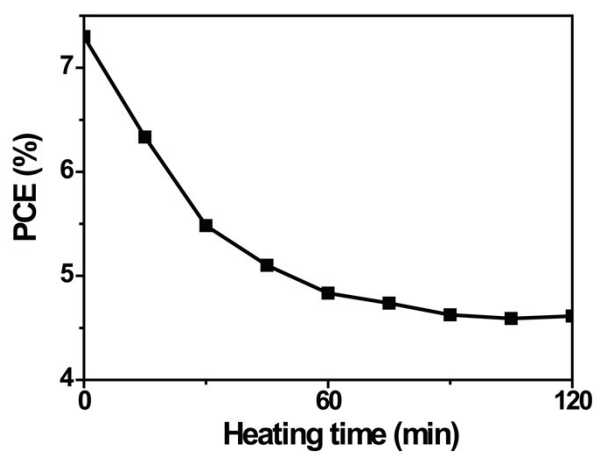

**Fig. s2** Stability curve of the m-BHJ-0 device under continuous heating at 130 °C for 120 min.

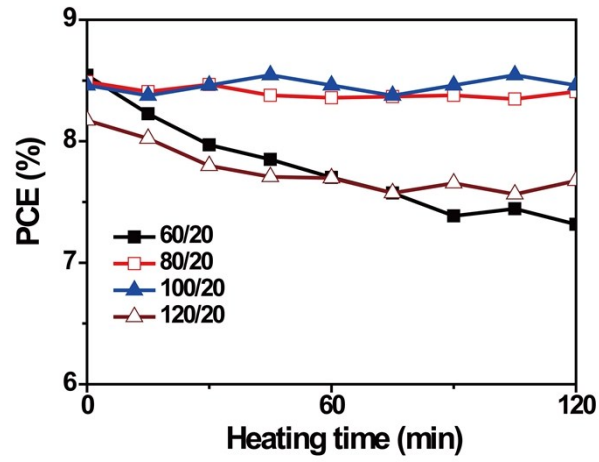

Fig. s3 Stability curves of s-BHJ devices with different pre-annealing temperatures.

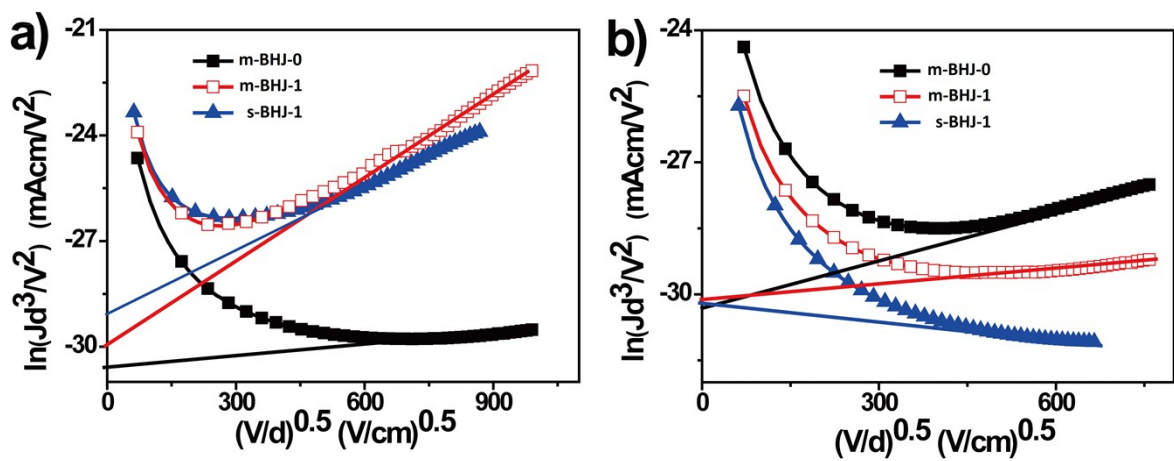

Fig. s4  $J$ - $V$  characteristics under dark for a) hole-only and b) electron-only devices based on m-BHJ and s-BHJ films.

## Calculation of the surface compositions

$$\begin{aligned}
 \text{PTB7 - TH weight content} &= \frac{\text{Polymer weight}}{\text{Polymer weight} + \text{PCBM weight}} \\
 &= \frac{n_{\text{polymer}} M_{\text{polymer}}}{n_{\text{polymer}} M_{\text{polymer}} + n_{\text{PCBM}} M_{\text{PCBM}}} \\
 &= \frac{1}{1 + \frac{n_{\text{PCBM}} M_{\text{PCBM}}}{n_{\text{polymer}} M_{\text{polymer}}}} \\
 \frac{2n_{\text{polymer}} + 2n_{\text{PCBM}}}{n_{\text{polymer}}} &= \frac{O}{F} \\
 \frac{n_{\text{PCBM}}}{n_{\text{polymer}}} &= 0.5 \left( \frac{O}{F} - 2 \right) = 0.5 \frac{O}{F} - 1 \\
 \text{PTB7 - TH weight content} &= \frac{1}{\left( \frac{M_{\text{PCBM}}}{M_{\text{polymer}}} \right) \left( 0.5 \frac{O}{F} - 1 \right) + 1}
 \end{aligned}$$

$M_{\text{PCBM}}$  is the molecular weight of PC<sub>71</sub>BM (1016);

$M_{\text{polymer}}$  is the molecular weight of repeat unit of PTB7-TH (905);

$n_{\text{PCBM}}$  is the mole number of PC<sub>71</sub>BM;

$n_{\text{polymer}}$  is the mole number of repeat unit of PTB7-TH;

$\frac{O}{F}$  is the atom ratio of O/F.
